# Supplementary material
Source: publisher site journal article supplement (https://www.dovepress.com/article/564809)
Supplement: Supplementary file 1 [file 564809%20Revised%20%2509Supplementary%20File%201.docx]

**Supplementary File 1. Detailed search strategy and PRISMA-ScR checklist**

**Methods**

This review was performed by adhering to the Preferred Reporting Items for Systematic Reviews and Meta-Analyses extension for Scoping Reviews (PRISMA-ScR) framework (Supplementary Table 1).

**Search strategy**

A comprehensive literature search was carried out across PubMed, Embase, Web of Science, and Scopus from January 2010 to June 2024. The keywords and MeSH terms used included “varicose veins,” “great saphenous vein,” “varicocele,” “pelvic varices,” “rectal varices,” “esophageal varices,” “nursing,” “care,” “management,” and “rehabilitation.” Boolean operators (“AND”, “OR”) were applied to combine terms appropriately. Reference lists of included studies and relevant clinical guidelines were also screened to ensure completeness.

**Eligibility criteria**

Publications were considered eligible if they matched the following criteria: (1) focused on nursing or clinical care strategies for any form of varicose veins; (2) presented original data, guidelines, or evidence-based recommendations; and (3) were published in peer-reviewed English journals. However, conference abstracts, commentaries, and articles without clinical or nursing relevance were excluded.

Study selection and data extraction

All data retrieved from the eligible publications were independently screened by two reviewers by assessing the studies’ title, abstract, and full-text. Then, data were extracted and entered into comparative tables, focusing on nursing interventions (e.g., compression therapy, postoperative management, psychological support), effectiveness, limitations, and patient outcomes.

**Evidence Synthesis**

The findings of this study were grouped according to the type of varicose vein, including great saphenous vein, varicocele, pelvic, rectal, and esophageal varices. We then compared the common variables such as patient compliance, individualized nursing approaches and more across these categories, which were summarized in a descriptive manner.

Supplementary Table 1. Summary of literature search strategy

| **Database** | **Search Terms** | **Time Frame** | **Inclusion Criteria** | **Exclusion Criteria** | **Number of Studies Retrieved / Included** |
| --- | --- | --- | --- | --- | --- |
| PubMed | “varicose veins” AND “nursing care” OR “compression therapy” OR “postoperative care” OR “psychological support” | 2010–2024 | Articles focusing on nursing interventions, postoperative management, and patient education in varicose vein care | Non-nursing studies, case reports without nursing focus, animal studies | 126 / 58 |
| Web of Science | “varicose veins” AND “nursing management” OR “nursing intervention” OR “care strategy” | 2010–2024 | Peer-reviewed articles in English addressing nursing strategies or quality of care | Surgical technique papers, abstracts only | 103 / 41 |
| CINAHL | “nursing practice” AND “venous disease” OR “compression” OR “patient education” | 2010–2024 | Studies emphasizing nursing assessment, intervention, and patient compliance | Non-human or pediatric-only studies | 87 / 37 |
| CNKI | “静脉曲张 护理” (“varicose vein nursing”) OR “护理干预” (“nursing intervention”) | 2010–2024 | Chinese-language nursing research and reviews on varicose vein care | Non-clinical studies, incomplete data | 64 / 29 |

Note: Duplicates were removed after cross-database screening. A total of 165 studies were included for full-text review and thematic analysis.
